# Supplementary material for: Comparative study in estrogen-depleted mice identifies skeletal and osteocyte transcriptomic responses to abaloparatide and teriparatide
Source: PubMed Central journal article supplement (PMC10619488; doi:10.1172/jci.insight.161932), 2023-10-23
Supplement: jciinsight-8-161932-s074.pdf [file jciinsight-8-161932-s074.pdf]

**A**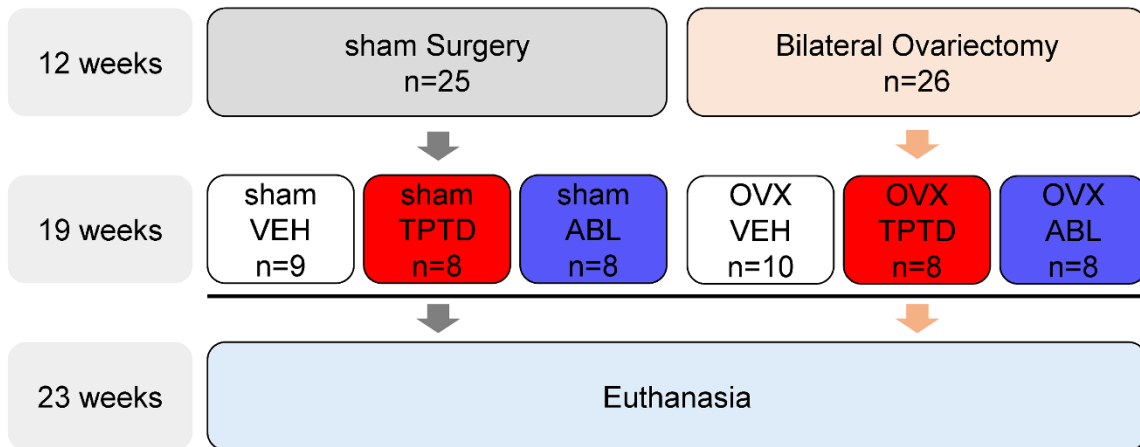**B**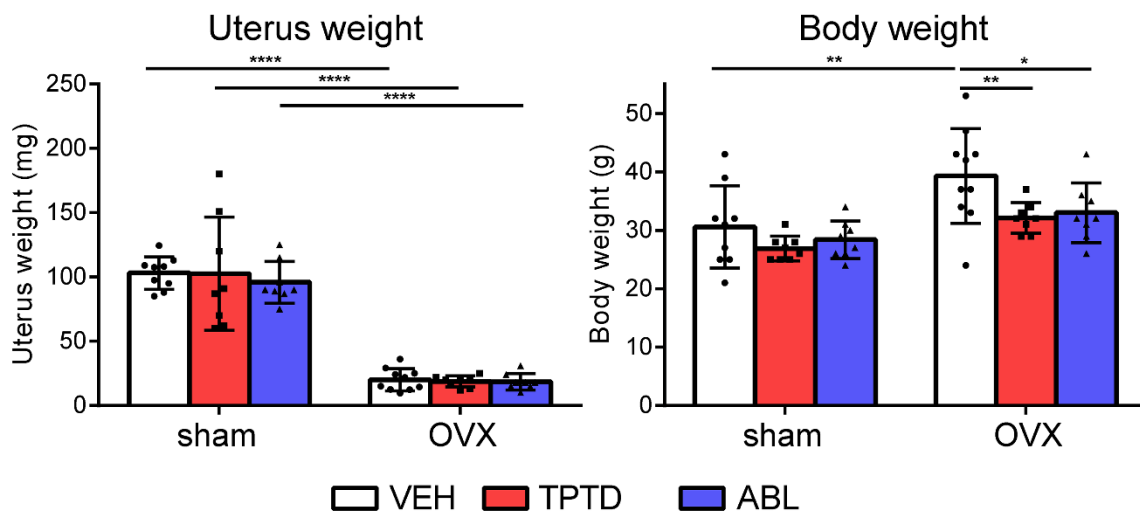

**Figure S1.** Flow chart and quality control of the study. A. Study design. B. Uterus and body weight in sham and OVX groups. Two-way ANOVA followed by Fisher's LSD test. \* $p < 0.05$ , \*\* $p < 0.01$ , \*\*\* $p < 0.001$ , \*\*\*\* $p < 0.0001$ .

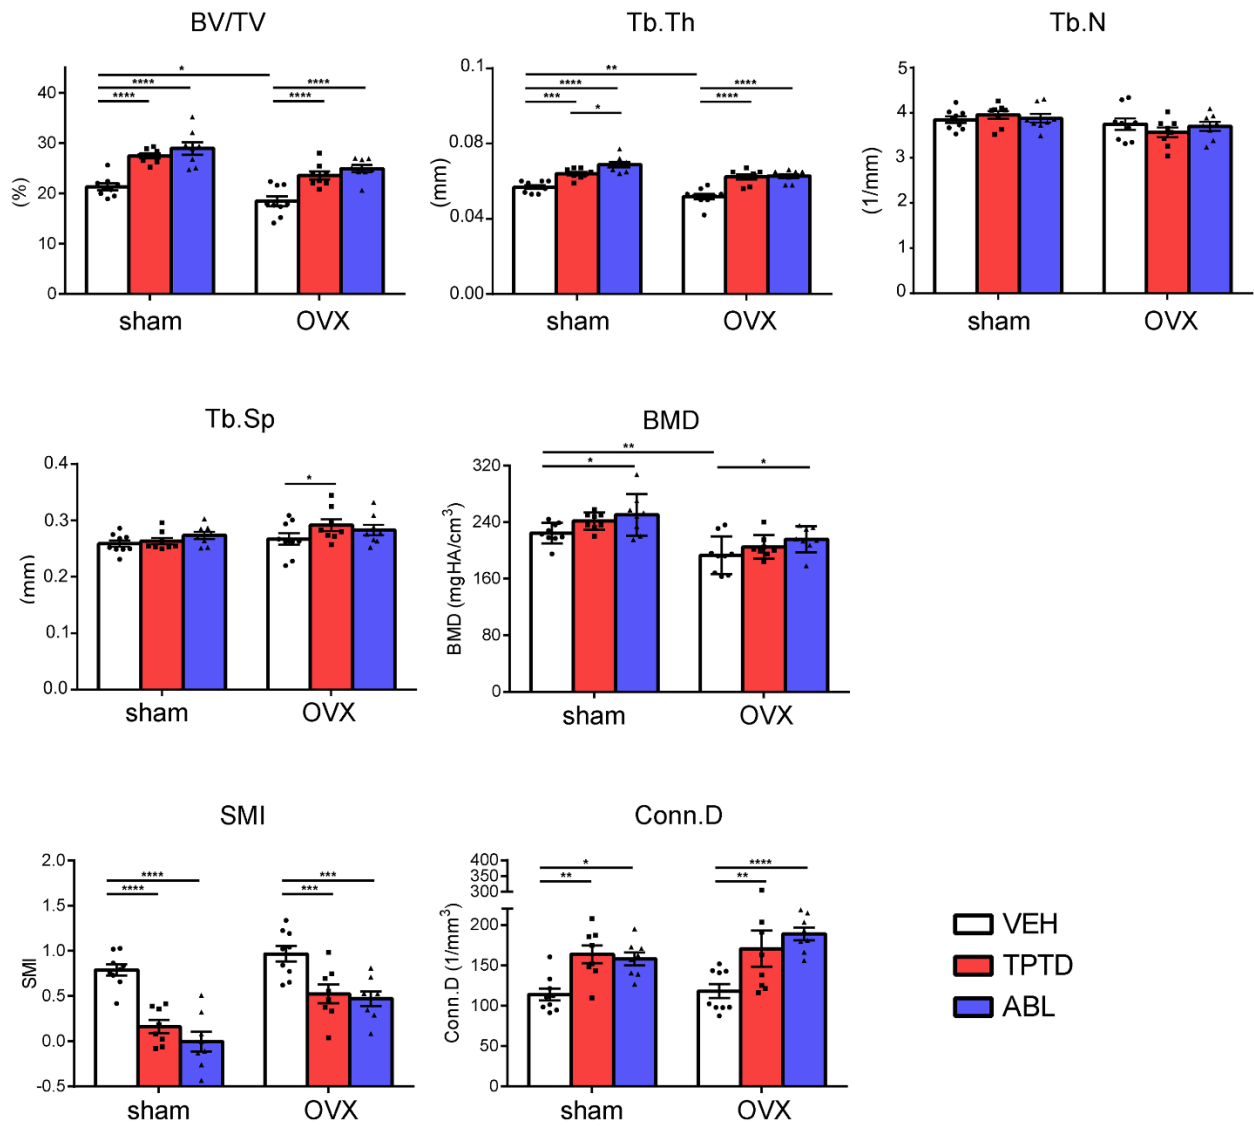

**Figure S2.** Trabecular bone responses.  $\mu$ CT analysis of trabecular bone at L5 vertebrae in sham and OVX groups treated with vehicle, TPTD, or ABL. Data are expressed as mean  $\pm$  SEM. Individual dots represents the number of mice in each group. Two-way ANOVA followed by Fisher's LSD test. \* $p < 0.05$ , \*\* $p < 0.01$ , \*\*\* $p < 0.001$ , \*\*\*\* $p < 0.0001$ .

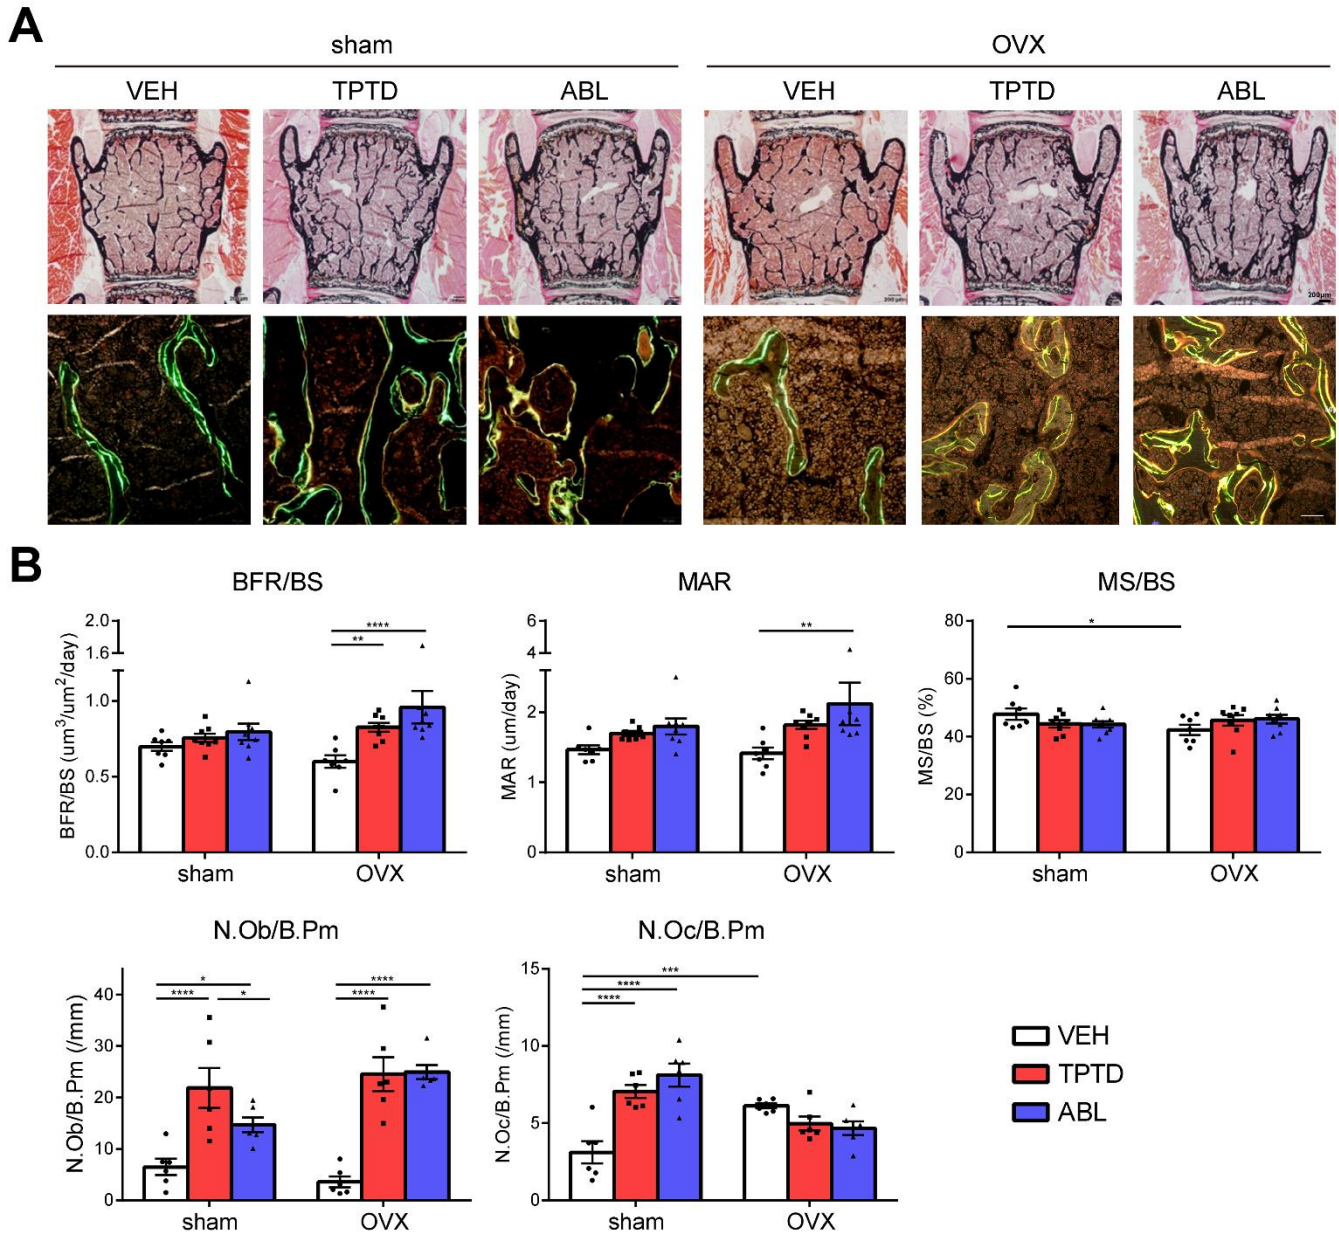

**Figure S3. Trabecular bone responses.** Histomorphometry analysis of trabecular bone at L5 vertebrae in sham and OVX groups treated with vehicle, TPTD or ABL. **A)** Representative images of Von Kossa Staining (upper panel) and calcein double labeling (lower panel). **B)** Dynamic and cellular histomorphometry analysis. Data are expressed as mean  $\pm$  SEM. Individual dots represents the number of mice in each group. Two-way ANOVA followed by Fisher's LSD test. \* $p < 0.05$ , \*\* $p < 0.01$ , \*\*\* $p < 0.001$ , \*\*\*\* $p < 0.0001$ .

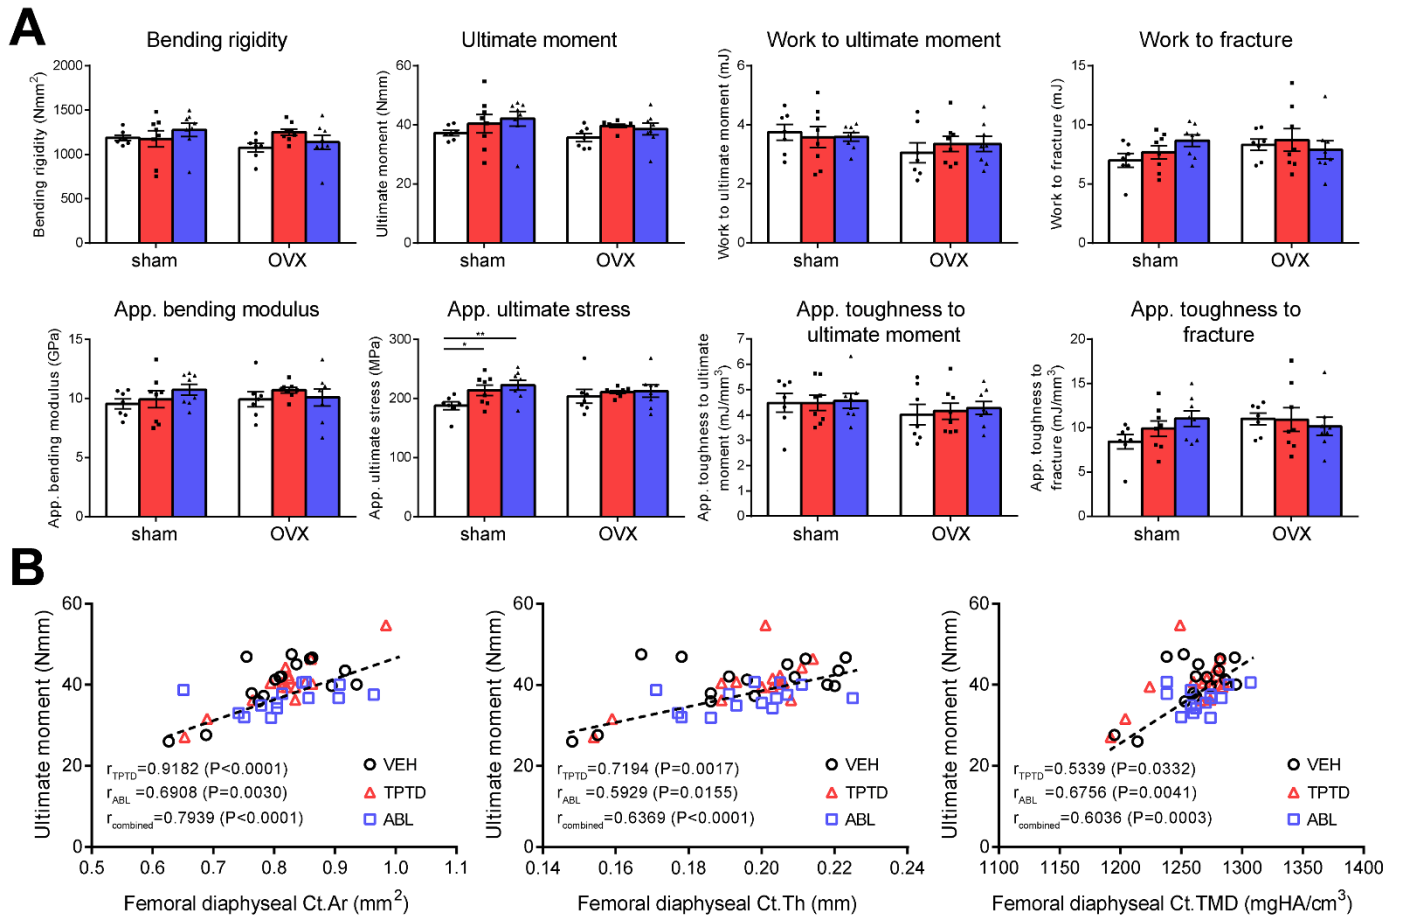

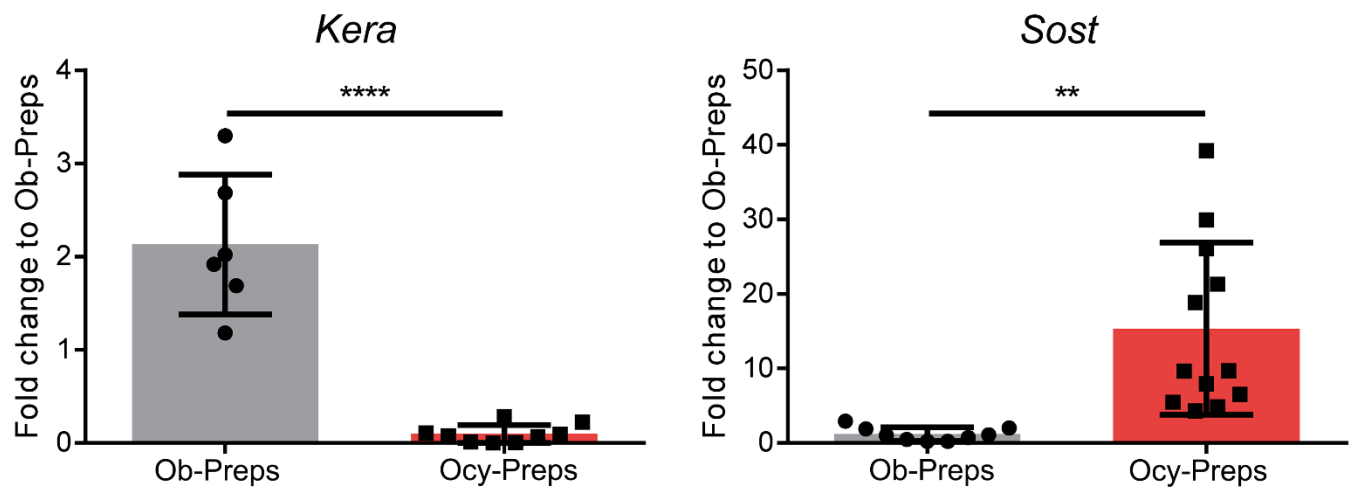

**Figure S5.** Validation of osteocyte-enriched population. qRT-PCR analysis of *Kera* and *Sost* expression in OB- and Ocy-enriched fractions. Data are expressed as mean  $\pm$  SD. Individual dots represents the number of mice in each group. Unpaired Student t-test; \*\*p<0.01, \*\*\*\*p<0.0001.

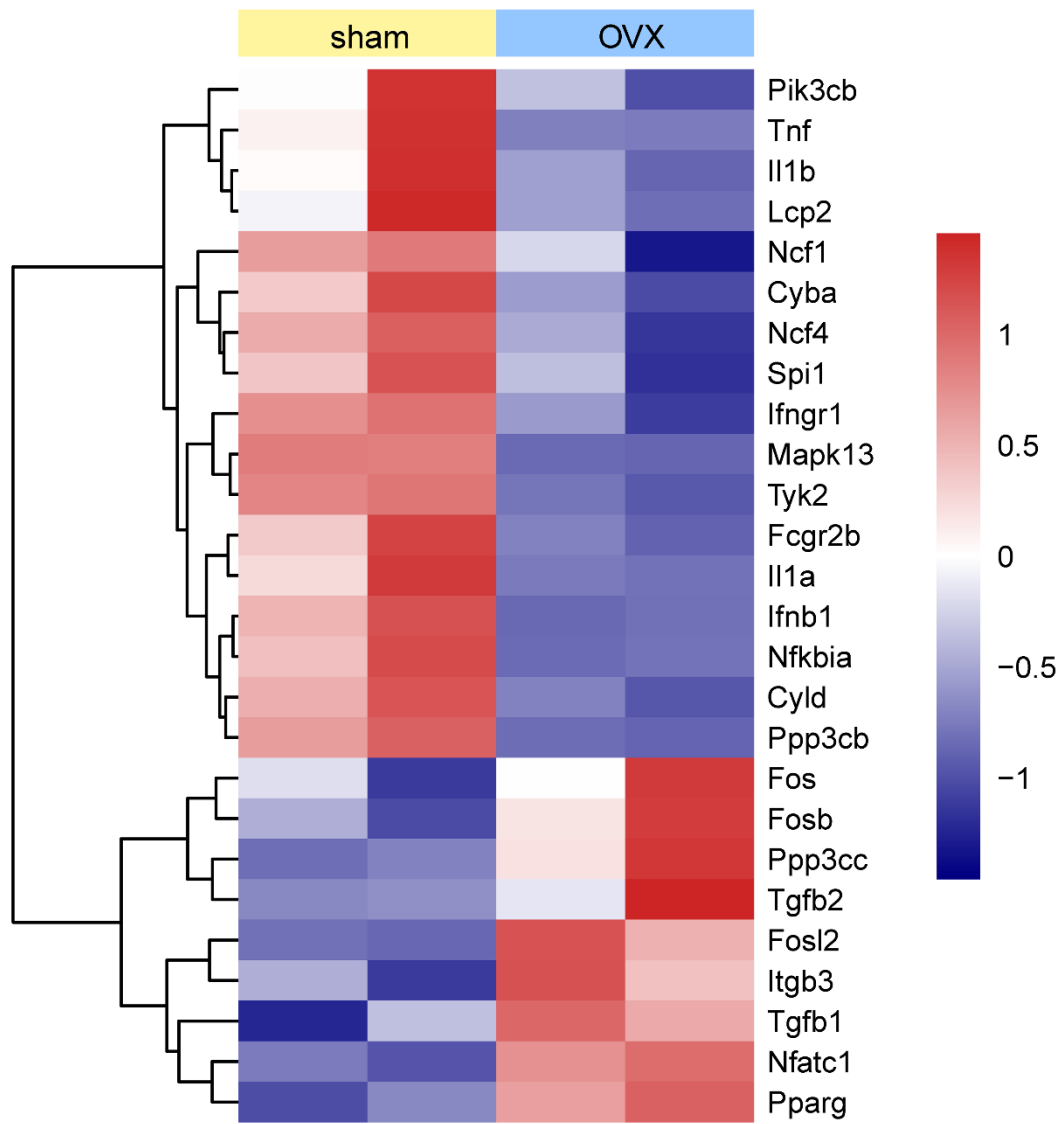

**Figure S6.** *Bulk RNA-seq.* HeatMap of genes relevant to osteoclast differentiation.

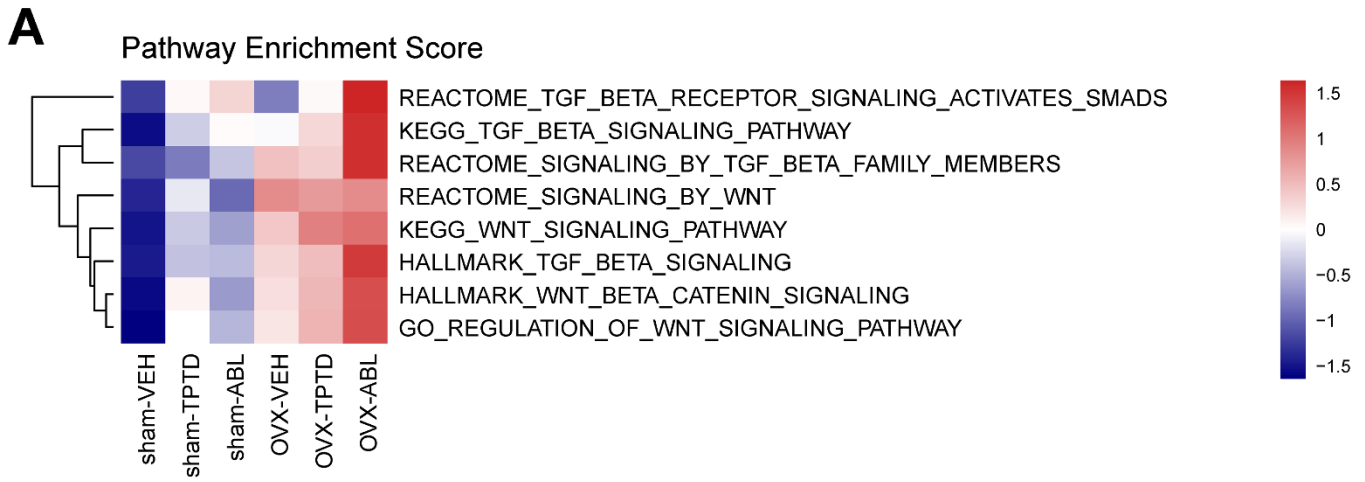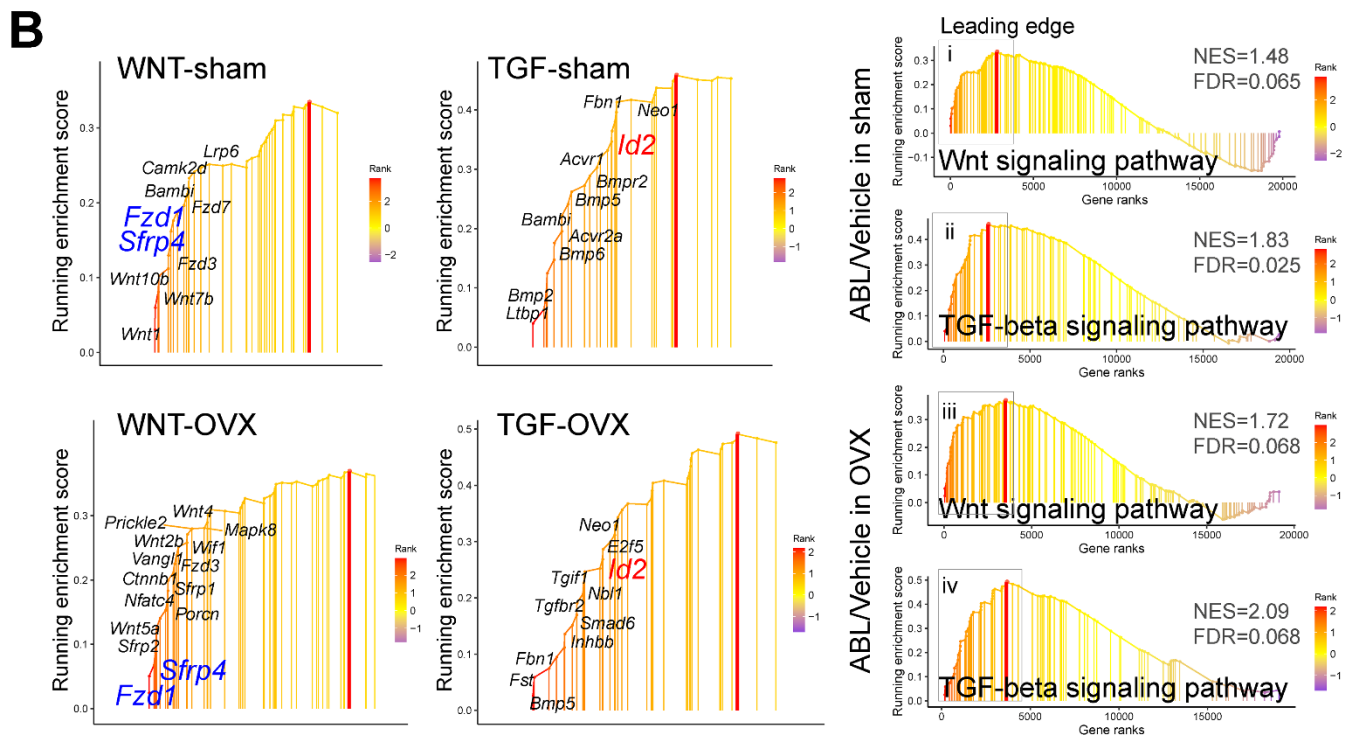

**Figure S7. Bulk RNA-seq.** Wnt and TGF signaling regulation by TPT or ABL4 treatment in sham or OVX groups. **A)** Pathway enrichment score estimated by ssGSEA. **B)** *Sfrp4* and *Fzd1* (blue) are genes belonging to the Wnt signaling regulated by both TPTD and ABL. *Id2* (red), a gene of the TGF signaling pathway is regulated only by ABL.

**Table S1.**  $\mu$ CT and histomorphometry analyses of L5 vertebrae.

| Parameters                                                 | sham          |                             |                             | OVX                          |                              |                              |
|------------------------------------------------------------|---------------|-----------------------------|-----------------------------|------------------------------|------------------------------|------------------------------|
|                                                            | VEH           | TPTD                        | ABL                         | VEH                          | TPTD                         | ABL                          |
| <b>m-CT</b>                                                |               |                             |                             |                              |                              |                              |
| BV/TV (%)                                                  | 21.314±0.668  | 27.459±0.487 <sup>A</sup>   | 28.965±1.247 <sup>A</sup>   | 18.427±0.972 <sup>aBC</sup>  | 23.583±0.813 <sup>BCD</sup>  | 24.936±0.742 <sup>AbCD</sup> |
| BMD (mgHA/cm <sup>3</sup> )                                | 224.333±4.910 | 241.375±4.338               | 250.500±10.428 <sup>a</sup> | 193.111±8.832 <sup>ABC</sup> | 205.000±5.880 <sup>BC</sup>  | 215.625±6.478 <sup>bCd</sup> |
| BS/BV (mm <sup>2</sup> /mm <sup>3</sup> )                  | 40.481±0.762  | 35.136±0.661 <sup>A</sup>   | 32.806±0.661 <sup>A</sup>   | 44.857±1.564 <sup>ABC</sup>  | 37.053±1.033 <sup>aCD</sup>  | 36.799±0.800 <sup>acD</sup>  |
| Conn.D. (1/mm <sup>3</sup> )                               | 113.678±7.323 | 163.550±11.063 <sup>A</sup> | 157.925±7.813 <sup>a</sup>  | 117.978±8.597 <sup>Bc</sup>  | 170.525±22.378 <sup>AD</sup> | 188.838±7.046 <sup>AD</sup>  |
| SMI                                                        | 0.790±0.062   | 0.164±0.072 <sup>A</sup>    | -0.004±0.108 <sup>A</sup>   | 0.968±0.086 <sup>BC</sup>    | 0.525±0.102 <sup>aBCD</sup>  | 0.472±0.082 <sup>abCD</sup>  |
| Tb.N (1/mm)                                                | 3.847±0.074   | 3.953±0.089                 | 3.879±0.089                 | 3.748±0.124                  | 3.564±0.109 <sup>bc</sup>    | 3.700±0.100                  |
| Tb.Th (mm)                                                 | 0.057±0.001   | 0.064±0.001 <sup>A</sup>    | 0.069±0.001 <sup>Ab</sup>   | 0.052±0.001 <sup>ABC</sup>   | 0.062±0.001 <sup>ACD</sup>   | 0.063±0.001 <sup>ACD</sup>   |
| Tb.Sp (mm)                                                 | 0.259±0.006   | 0.263±0.006                 | 0.273±0.06                  | 0.267±0.010                  | 0.292±0.010 <sup>AcD</sup>   | 0.283±0.009 <sup>ab</sup>    |
| <b>Histomorphometry</b>                                    |               |                             |                             |                              |                              |                              |
| BFR/BS ( $\mu$ m <sup>3</sup> / $\mu$ m <sup>2</sup> /day) | 0.679±0.029   | 0.755±0.028                 | 0.795±0.053 <sup>d</sup>    | 0.598±0.041 <sup>c</sup>     | 0.825±0.030 <sup>D</sup>     | 0.958±0.107 <sup>AbcD</sup>  |
| BFR/BV (%/day)                                             | 3.667±0.161   | 4.699±0.255 <sup>a</sup>    | 4.301±0.320 <sup>d</sup>    | 3.228±0.242 <sup>Bc</sup>    | 4.804±0.203 <sup>aD</sup>    | 5.432±0.672 <sup>AcD</sup>   |
| MAR ( $\mu$ m/day)                                         | 1.466±0.061   | 1.699±0.034                 | 1.799±0.114                 | 1.414±0.082                  | 1.820±0.059                  | 2.121±0.303 <sup>Abd</sup>   |
| MS/BS (%)                                                  | 47.780±1.951  | 44.426±1.260                | 44.233±1.159                | 42.320±1.770 <sup>a</sup>    | 45.604±1.809                 | 46.068±1.493                 |
| N.Ob/B.Pm (/mm)                                            | 6.474±1.597   | 21.875±3.878 <sup>A</sup>   | 14.703±1.442 <sup>ab</sup>  | 3.591±1.069 <sup>BC</sup>    | 24.550±3.258 <sup>ACD</sup>  | 24.951±1.377 <sup>ACD</sup>  |
| N.Oc/B.Pm (/mm)                                            | 3.107±0.717   | 7.057±0.427 <sup>A</sup>    | 8.101±0.750 <sup>A</sup>    | 6.123±0.163 <sup>Ac</sup>    | 4.965±0.451 <sup>abC</sup>   | 4.671±0.450 <sup>abC</sup>   |
| Ob.S/BS (%)                                                | 8.792±2.022   | 29.478±5.158 <sup>A</sup>   | 20.364±1.877 <sup>ab</sup>  | 4.884±1.402 <sup>BC</sup>    | 30.794±3.981 <sup>AcD</sup>  | 33.359±1.368 <sup>ACD</sup>  |
| Oc.S/BS (%)                                                | 5.824±1.338   | 14.951±1.116 <sup>A</sup>   | 17.636±2.044 <sup>a</sup>   | 12.411±0.599 <sup>BC</sup>   | 9.759±1.032 <sup>Bc</sup>    | 9.504±1.021 <sup>Bc</sup>    |
| OS/BS (%)                                                  | 4.939±1.655   | 14.082±4.139 <sup>a</sup>   | 8.972±1.429 <sup>G</sup>    | 4.344±0.657 <sup>B</sup>     | 14.379±2.838 <sup>AD</sup>   | 18.542±2.146 <sup>ACD</sup>  |
| O.Th ( $\mu$ m)                                            | 3.130±0.142   | 3.090±0.151                 | 3.035±0.112                 | 3.046±0.165                  | 2.948±0.069                  | 3.136±0.151                  |

Data are expressed as Mean±SEM. Two-Way ANOVA followed by Fisher's LSD test. a=P<0.05 and A=P<0.01 compared to sham-VEH; b=P<0.05 and B=P<0.01 compared to sham-TPTD; c=P<0.05 and C=P<0.01 compared to sham-ABL; d=P<0.05 and D=P<0.01 compared to OVX-VEH; e=P<0.05 and E=P<0.01 compared to OVX-TPTD.



**Table S2.** Serum bone formation and resorption markers.

| Parameters | sham         |              |                           | OVX                         |                             |                            |
|------------|--------------|--------------|---------------------------|-----------------------------|-----------------------------|----------------------------|
|            | VEH          | TPTD         | ABL                       | VEH                         | TPTD                        | ABL                        |
| CTX        | 19.221±3.089 | 20.135±0.744 | 16.054±0.980              | 26.289±4.729 <sup>c</sup>   | 22.389±2.519                | 19.463±1.462               |
| P1NP       | 37.323±3.912 | 33.283±2.672 | 22.569±2.022 <sup>a</sup> | 52.966±8.200 <sup>aBC</sup> | 51.955±4.037 <sup>abC</sup> | 45.279±4.294 <sup>bC</sup> |

Data are expressed as Mean±SEM. Two-WAY ANOVA followed by Fisher's LSD test. a=P<0.05 and A=P<0.01 compared to sham-VEH; b=P<0.05 and B=P<0.01 compared to sham-TPTD; c=P<0.05 and C=P<0.01 compared to sham-ABL; d=P<0.05 and D=P<0.01 compared to OVX-VEH; e=P<0.05 and E=P<0.01 compared to OVX-TPTD.

**Table S3.** Femur Biomechanical analysis.

| Parameters                                              | sham            |                            |                            | OVX                          |                 |                 |
|---------------------------------------------------------|-----------------|----------------------------|----------------------------|------------------------------|-----------------|-----------------|
|                                                         | VEH             | TPTD                       | ABL                        | VEH                          | TPTD            | ABL             |
| App. bending modulus (GPa)                              | 9.551±0.416     | 9.939±0.712                | 10.749±0.466               | 9.937±0.630                  | 10.713±0.228    | 10.109±0.725    |
| App. ultimate stress (MPa)                              | 188.096±6.605   | 214.030±8.712 <sup>a</sup> | 222.671±8.473 <sup>A</sup> | 203.947±11.740               | 211.193±2.698   | 212.706±10.378  |
| App. toughness to fracture (mJ/mm <sup>3</sup> )        | 8.417±0.808     | 9.901±0.880                | 11.041±0.873               | 11.006±0.659                 | 10.921±1.336    | 10.160±1.016    |
| App. toughness to ultimate moment (mJ/mm <sup>3</sup> ) | 4.479±0.369     | 4.473±0.299                | 4.561±0.297                | 4.019±0.408                  | 4.155±0.318     | 4.275±0.258     |
| Bending rigidity (Nmm <sup>2</sup> )                    | 1186.857±30.467 | 1176.375±91.965            | 1276.750±76.553            | 1076.429±49.277 <sup>c</sup> | 1252.500±36.819 | 1139.375±79.433 |
| Ultimate moment (Nmm)                                   | 37.257±0.912    | 40.400±3.078 <sup>e</sup>  | 42.100±2.481               | 35.671±1.326 <sup>c</sup>    | 39.675±0.564    | 38.638±1.987    |
| Work to fracture (mJ)                                   | 6.994±0.576     | 7.693±0.563                | 8.674±0.492                | 8.317±0.479                  | 8.720±0.955     | 7.891±0.769     |
| Work to ultimate moment (mJ)                            | 3.746±0.270     | 3.579±0.351                | 3.590±0.144                | 3.053±0.338                  | 3.353±0.257     | 3.351±0.258     |

Data are expressed as Mean±SEM. Two-WAY ANOVA followed by Fisher's LSD test. a=P<0.05 and A=P<0.01 compared to sham-VEH; b=P<0.05 and B=P<0.01 compared to sham-TPTD; c=P<0.05 and C=P<0.01 compared to sham-ABL; d=P<0.05 and D=P<0.01 compared to OVX-VEH; e=P<0.05 and E=P<0.01 compared to OVX-TPTD.

**Table S4.** BSEM analysis of the osteocyte lacunar size.

| Parameters                              | sham         |                           |                           | OVX                        |                            |                            |
|-----------------------------------------|--------------|---------------------------|---------------------------|----------------------------|----------------------------|----------------------------|
|                                         | VEH          | TPTD                      | ABL                       | VEH                        | TPTD                       | ABL                        |
| %LcA                                    | 1.303±0.068  | 1.262±0.102               | 1.184±0.095               | 1.369±0.091                | 1.051±0.079 <sup>ad</sup>  | 1.17±0.053                 |
| LcD (10 <sup>4</sup> /μm <sup>2</sup> ) | 4.394±0.286  | 4.766±0.335               | 4.926±0.372               | 4.234±0.235                | 3.848±0.33 <sup>c</sup>    | 4.487±0.136                |
| LcA (μm <sup>2</sup> )                  | 29.855±1.060 | 26.583±1.266 <sup>A</sup> | 24.029±0.717              | 32.449±1.861 <sup>BC</sup> | 27.544±0.801 <sup>cd</sup> | 26.111±1.01 <sup>ad</sup>  |
| Freq of LcA <30 μm <sup>2</sup>         | 53.575±3.637 | 65.641±3.552 <sup>a</sup> | 71.119±2.596 <sup>A</sup> | 50.292±4.699 <sup>BC</sup> | 65.263±2.576 <sup>ad</sup> | 67.39±3.232 <sup>AD</sup>  |
| Freq of LcA ≥30 μm <sup>2</sup>         | 46.59±3.668  | 34.359±3.552 <sup>a</sup> | 28.356±2.51 <sup>A</sup>  | 49.483±4.728 <sup>BC</sup> | 34.737±2.576 <sup>ad</sup> | 32.61±3.232 <sup>AD</sup>  |
| Freq of LcA <20 μm <sup>2</sup>         | 25.579±2.567 | 32.655±4.963              | 39.654±2.191 <sup>A</sup> | 18.193±1.9 <sup>BC</sup>   | 28.776±3.704 <sup>cd</sup> | 35.835±1.356 <sup>ad</sup> |
| Freq of LcA 20-30 μm <sup>2</sup>       | 27.996±1.858 | 32.986±2.251              | 31.466±1.772              | 32.099±4.299               | 36.32±2.792 <sup>a</sup>   | 31.555±2.239               |
| Freq of LcA 30-40 μm <sup>2</sup>       | 26.411±2.411 | 21.146±2.101              | 20.973±1.7                | 26.158±2.836               | 23.283±1.779               | 19.689±2.337 <sup>ad</sup> |
| Freq of LcA 40-50 μm <sup>2</sup>       | 13.023±1.992 | 8.452±1.345               | 5.757±0.684 <sup>a</sup>  | 11.511±3.218 <sup>c</sup>  | 7.968±1.815 <sup>c</sup>   | 8.178±1.507                |
| Freq of LcA 50-60 μm <sup>2</sup>       | 5.476±0.879  | 2.578±0.758 <sup>a</sup>  | 0.591±0.31 <sup>A</sup>   | 6.55±1.807 <sup>BC</sup>   | 2.114±0.506 <sup>ad</sup>  | 2.47±0.935 <sup>ad</sup>   |
| Freq of LcA ≥60 μm <sup>2</sup>         | 1.89±0.645   | 2.183±0.682               | 1.035±0.546               | 5.34±2.344 <sup>ac</sup>   | 1.835±0.48 <sup>d</sup>    | 2.219±0.96                 |

Data are expressed as Mean±SEM. Two-Way ANOVA followed by Fisher's LSD test. a=P<0.05 and A=P<0.01 compared with sham-VEH; b=P<0.05 and B=P<0.01 compared with sham-TPTD; c=P<0.05 and C=P<0.01 compared with sham-ABL; d=P<0.05 and D=P<0.01 compared with OVX-VEH; e=P<0.05 and E=P<0.01 compared with OVX-TPTD.
